# Supplementary material
Source: PubMed Central journal article supplement (PMC2688581)
Supplement: 2008.000414_1.pdf [file 2008.000414_1.pdf]

# Establishment and validation of a standard protocol for the detection of minimal residual disease in B lineage childhood acute lymphoblastic leukemia by flow cytometry in a multi-center setting;

Julie Irving,<sup>1</sup> Jenny Jesson,<sup>2</sup> Paul Virgo,<sup>3</sup> Marian Case,<sup>1</sup> Lynne Minto,<sup>1</sup> Lisa Eyre,<sup>2</sup> Nigel Noel,<sup>3</sup> Ulrika Johansson,<sup>4</sup> Marion Macey,<sup>4</sup> Linda Knotts,<sup>5</sup> Margaret Helliwell,<sup>6</sup> Paul Davies,<sup>2</sup> Liam Whitby,<sup>7</sup> David Barnett,<sup>7</sup> Jeremy Hancock,<sup>3</sup> Nick Goulden<sup>8</sup> and Sarah Lawson<sup>2</sup> on behalf of the UKALL Flow MRD group and UK MRD steering group

<sup>1</sup>Northern Institute for Cancer Research, Newcastle upon Tyne; <sup>2</sup>Birmingham Children's Hospital, Birmingham; <sup>3</sup>Southmead Hospital, Bristol; <sup>4</sup>The Royal London Hospital, London; <sup>5</sup>Yorkhill Children's Hospital, Glasgow; <sup>6</sup>Sheffield Children's Hospital, Sheffield; <sup>7</sup>UK NEQAS for Leucocyte Immunophenotyping, Royal Hallamshire Hospital, Sheffield, and <sup>8</sup>Great Ormond Street Children's Hospital, London, UK

*Citation:* Irving J, Jesson J, Virgo P, Case M, Minto L, Eyre L, Noel N, Johansson U, Macey M, Knotts L, Helliwell M, Davies P, Whitby L, Barnett D, Hancock J, Goulden N, and Lawson S on behalf of the UKALL Flow MRD group and UK MRD steering group. Establishment and validation of a standard protocol for the detection of minimal residual disease in B lineage childhood acute lymphoblastic leukemia by flow cytometry in a multi-center setting. *Haematologica* 2009; doi:10.3324/haematol.2008.000414

## Design and Methods

### MRD by Flow cytometry

The UKALL Flow MRD network was established in 2001 and a common MRD protocol was devised after extensive consultation and includes features previously detailed in reports from St Jude Children's Research Hospital<sup>1</sup> and the Biomed group.<sup>2,3</sup> All the network laboratories followed the same experimental and analysis protocol and attended regular workshops to review data. Results, including dot plot images, were reported to a common website for independent review.

Bone marrow aspirates from patients entered into the UKALL 2003 trial were obtained at diagnosis, at the end of induction (day 28) and at the end of consolidation (week 11). The trial involves randomisation based on levels of MRD, as measured by PCR of patient-specific immunoglobulin rearrangements, at these two time points such that MRD high risk is defined as MRD equal to or greater than 0.01% at day 28, MRD low risk is MRD negative or less than 0.01% at day 28 and negative at week 11. All other patients are classified as indeterminate. The study had appropriate ethical approval. Samples were collected into ACDA and either red cell lysed using a standard ammonium chloride procedure or enriched for mononuclear cells using Lymphoprep (Nycomed, Birmingham, UK), prior to antibody staining according to individual laboratories preference at the start of the study. Paired samples prepared by either method showed good correlation, although Lymphoprep tended to give higher values (*data not shown*). A list of antibodies used in the protocol is shown in *Supplementary Table S1*. At diagnosis, 8 antibody combinations were assessed with a common CD34/CD19/CD10 spine and a minimum of 50,000 events were acquired on a flow cytometer. The flow cytometers used in the study were two FACSCaliburs, a FACSCanto, two Coulter Epics XL, and a Coulter FC500.

For analysis, a sequential gating strategy was used: lymphoid cells were first gated on forward and side scatter, followed by CD19 positive, low side scatter cells, then CD19 positive CD34 negative and CD19/CD34 double positive cells. Finally, the expression of CD10 along with the discrimi-

**Online Supplementary Table S1.** Table of antibodies used in the standard protocol.

| Antibody | Coulter User<br>Clone<br>(Fluorochrome) | Manufacturer | BD User<br>Clone<br>(Fluorochrome) | Manufacturer |
|----------|-----------------------------------------|--------------|------------------------------------|--------------|
| CD10     | ALB1 (ECD)                              | IOtest       | HI10A (FITC or PE)                 | BD           |
| CD13     | SJ1D1 (PE)                              | IOtest       | L138 (PE)                          | BD           |
| CD19     | J4.119 (PC5)                            | IOtest       | SJ25C1 (APC)                       | BD           |
| CD20     | B9E9 (HRC20) (FITC)                     | IOtest       | L27(FITC)                          | BD           |
| CD22     | SJ10.1H11 (PE)                          | IOtest       | S-HCL-1 (PE)                       | BD           |
| CD33     | D3HL60.251 (PE)                         | IOtest       | P67.6 (PE)                         | BD           |
| CD34     | 581 (FITC or PE)                        | IOtest       | 8G12 (PERCP)                       | BD           |
| CD38     | T16 (FITC)                              | IOtest       | HB7 (FITC)                         | BD           |
| CD45     | J.33 (FITC)                             | IOtest       | 2D1 (FITC)                         | BD           |
| CD58     | A1CD58 (PE)                             | IOtest       | MY31 (PE)                          | BD           |
| KORSA    | KOR-SA3544 (FITC)                       | Immunotech   | KOR-SA3544 (FITC)                  | Immunotech   |

**Online Supplementary Table S2.** Table of percentage agreements on risk category for each lab compared to the consensus risk.

| Lab         | 1  | 2   | 3  | 4   | 5   | 6   |
|-------------|----|-----|----|-----|-----|-----|
| % Agreement | 90 | 100 | 80 | 100 | 100 | 100 |
| N=          | 42 | 35  | 35 | 38  | 40  | 18  |

natory 4<sup>th</sup> CD antigen was assessed in the CD34<sup>+</sup>CD19<sup>+</sup> and CD19<sup>+</sup> CD34<sup>-</sup> populations. The staining pattern of each combination was then compared to that of 'normal' bone marrows which were bone marrows taken from patients in remission in the latter stages of B lineage ALL or during the early and late stages of T-cell ALL therapy or from normal donor bone marrow harvests or from patients with idiopathic thrombocytopenia. Each laboratory was required to acquire 500,000 events for each leukemia associated immunophenotype from a minimum of 6 *normal* samples. Antibody combinations, in which the leukemic blasts fell into empty spaces,<sup>1</sup> distinct from regions housing normal B cell progenitors, were identified as leukemia-associated immunophenotypes (LAIP). At least 2 LAIPs were then tracked in follow up samples and a

**Online Supplementary Table S3. Table of interassay variability.**

| LAIP                         | Coulter XL  |       |        |             |       |        | Coulter FC500 |       |        |             |       |        |
|------------------------------|-------------|-------|--------|-------------|-------|--------|---------------|-------|--------|-------------|-------|--------|
|                              | 45/10/34/19 |       |        | 38/10/34/19 |       |        | 45/10/34/19   |       |        | 38/10/34/19 |       |        |
| Mock MRD (%)                 | 10%         | 0.50% | 0.05%  | 10%         | 0.50% | 0.05%  | 10%           | 0.50% | 0.05%  | 10%         | 0.50% | 0.05%  |
| Mean (n=10)                  | 7.825       | 0.561 | 0.047  | 8.016       | 0.572 | 0.049  | 7.762         | 0.555 | 0.048  | 7.761       | 0.560 | 0.049  |
| Standard deviation           | 0.174       | 0.031 | 0.005  | 0.329       | 0.031 | 0.006  | 0.283         | 0.026 | 0.006  | 0.253       | 0.018 | 0.006  |
| Coefficient of variation (%) | 2.217       | 5.472 | 10.213 | 4.101       | 5.332 | 11.633 | 3.646         | 4.595 | 13.125 | 3.259       | 3.143 | 11.633 |

**Online Supplementary Table S4. Frequencies of LAIPS detected and used in the study.**

| Discriminatory CD marker | Expression characteristic | Frequency of detection (%) | Frequency of use in follow-up samples (%) * | Common LAIP pairs | Frequency of detection (%) |
|--------------------------|---------------------------|----------------------------|---------------------------------------------|-------------------|----------------------------|
| CD45                     | Underexpression           | 73                         | 78                                          | CD45 and CD38     | 47                         |
| CD38                     | Underexpression           | 63                         | 66                                          | CD45 and Korsa    | 8                          |
| CD58                     | Overexpression            | 55                         | 22                                          | CD45 and CD58     | 6                          |
| Korsa                    | Aberrant                  | 34                         | 22                                          | CD38 and Korsa    | 4                          |
| CD20                     | Underexpression           | 7                          | 3                                           |                   |                            |
| CD13                     | Aberrant                  | 11                         | 4                                           |                   |                            |
| CD33                     | Aberrant                  | 9                          | 0                                           |                   |                            |
| CD22                     | Overexpression            | 5                          | 3                                           |                   |                            |

\*This is the frequency of the minimum two markers used in this patient cohort.

minimum of 500,000 events acquired. Samples were considered positive if the number of leukemic cells identified with one or more LAIP combinations was equal to or greater than 0.01% (i.e. the number of leukemic cells/ total number of nucleated cells expressed as a percentage) and at least 50 clustered events were apparent. For those discriminatory antigens which were overexpressed, subtraction of isotype control events was performed.

### MRD by molecular analyses

Molecular MRD analysis was performed by the four laboratories of the UKMRD laboratory network (based in Bristol, Glasgow, the Royal London and Sheffield) according to a standard SOP and using centrally purchased reagents and consumables. This SOP was based on the methodology previously reported by the BIOMED-1 and BIOMED-2 Concerted Action Groups.<sup>4,5</sup> Briefly, diagnostic DNA was screened by PCR for rearrangements at the IgH, IgK, TCRD, TCRG, TCRB and Sil-Tal1 loci. Homogeneity of amplified products was determined using heteroduplex analysis and thereafter monoclonal products were sequenced directly. Bi-allelic products were excised from gels, re-amplified and then sequenced. Classification of the junctional region(s) of each rearrangement was performed by comparison relative to germline sequences contained in the NCBI or IMGT reference databases. RQ-PCR-based detection of MRD was undertaken using allele-specific oligonucleotides, designed to span the patient-specific junctional region of the target, in conjunction with consensus dual-labelled probes and reverse primers. Analysis of MRD at day 28 and week 11 was undertaken using two patient-specific real-time assays each capable of detecting disease down to a level of 1/10,000 (quantitative range=10<sup>4</sup>). Quantitation of disease level was performed by comparison

of the amplification seen relative to that observed in a patient-specific logarithmic dilution series and with reference to that seen in normal template DNA and no template containing controls. To correct for the quantity and quality of DNA, RQ-PCR analysis of the albumin gene was used. All assays were analysed according to ESG-MRD-ALL guidelines.<sup>6</sup>

### References

- Campana D, Coustan-Smith E. Advances in the immunological monitoring of childhood acute lymphoblastic leukaemia. *Best Pract Res* 2002;15:1-19.
- Lucio P, Gaipa G, van Lochem EG, van Wering ER, Porwit-MacDonald A, Faria T, et al. BIOMED-I concerted action report: flow cytometric immunophenotyping of precursor B-ALL with standardized triple-stainings. BIOMED-1 Concerted Action Investigation of Minimal Residual Disease in Acute Leukemia: International Standardization and Clinical Evaluation. *Leukemia* 2001;15:1185-92.
- Lucio P, Parreira A, van den Beemd MW, van Lochem EG, van Wering ER, Baars E, et al. Flow cytometric analysis of normal B cell differentiation: a frame of reference for the detection of minimal residual disease in precursor-B-ALL. *Leukemia* 1999;13:419-27.
- van Dongen JJ, Langerak AW, Brüggemann M, Evans PA, Hummel M, Lavender FL, et al. Design and standardization of PCR primers and protocols for detection of clonal immunoglobulin and T-cell receptor gene recombinations in suspect lymphoproliferations: report of the BIOMED-2 Concerted Action BMH4-CT98-3936. *Leukemia* 2003;17:2257-317.
- Pongers-Willems MJ, Seriu T, Stolz F, d'Aniello E, Gameiro P, Pisa P, et al. Primers and protocols for standardized detection of minimal residual disease in acute lymphoblastic leukemia using immunoglobulin and T cell receptor gene rearrangements and TAL1 deletions as PCR targets: report of the BIOMED-1 CONCERTED ACTION: investigation of minimal residual disease in acute leukemia. *Leukemia* 1999;13:110-8.
- van der Velden VH, Cazzaniga G, Schrauder A, Hancock J, Bader P, Panzer-Grumayer ER, et al. Analysis of minimal residual disease by Ig/TCR gene rearrangements: guidelines for interpretation of real-time quantitative PCR data. *Leukemia* 2007;21:604-11.
